# Supplementary material
Source: HighWire-hosted journal article supplement (https://bmjopen.bmj.com/content/15/5/e097851)
Supplement: inline-supplementary-material-1 [file inline-supplementary-material-1.pdf]

SUPPLEMENTARY APPENDIX

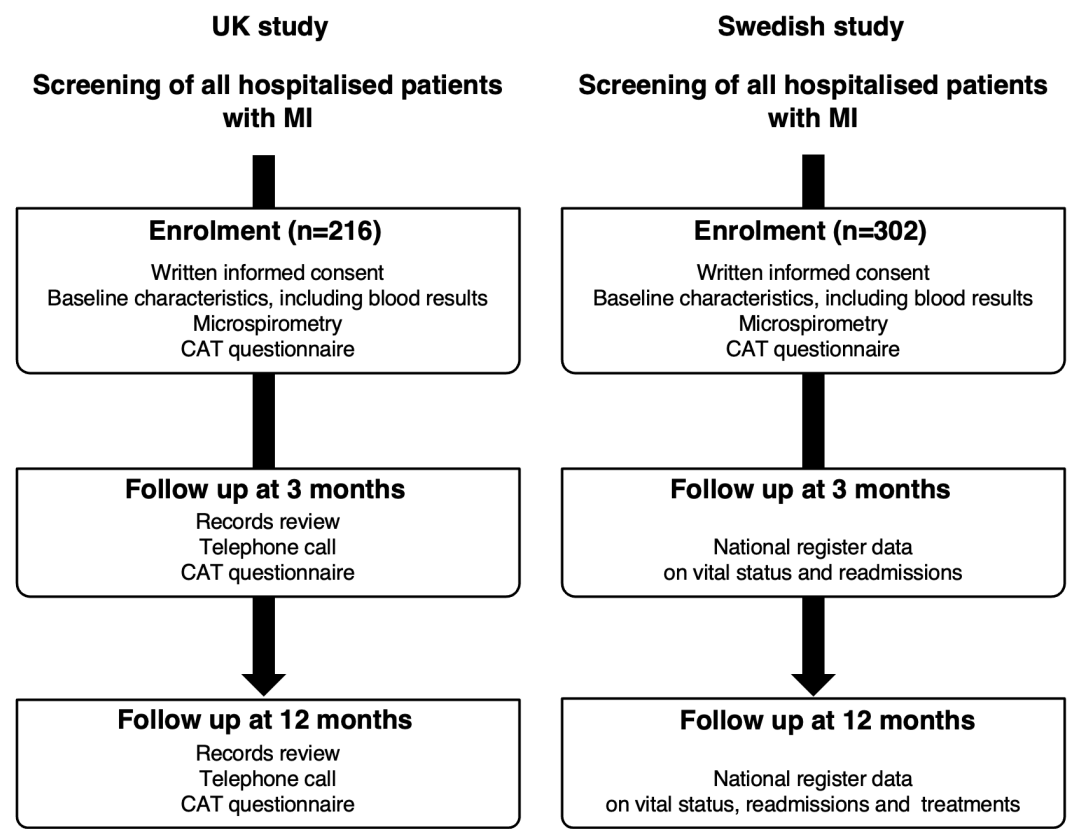

**Supplemental Figure 1** Design of the two observational studies of patients with significant smoking history hospitalised for myocardial infarction (MI). Combined data from the enrolment visit are presented in this manuscript. CAT, chronic obstructive pulmonary disease assessment test.

**Supplementary Table 1** Mean ( $\pm$  standard deviation) COPD assessment test (CAT) scores in the UK cohort stratified by domain and by presence or absence of GOLD stage 2 or greater airflow obstruction.

| Domain                 | GOLD $\geq 2$ Absent | GOLD $\geq 2$ Present |
|------------------------|----------------------|-----------------------|
| Cough                  | 2.1 $\pm$ 1.3        | 2.3 $\pm$ 1.4         |
| Phlegm                 | 1.3 $\pm$ 1.4        | 1.6 $\pm$ 1.6         |
| Chest Tightness        | 1.4 $\pm$ 1.5        | 1.5 $\pm$ 1.4         |
| Breathlessness         | 2.3 $\pm$ 1.7        | 2.7 $\pm$ 1.9         |
| Limitation of Activity | 1.3 $\pm$ 1.7        | 1.7 $\pm$ 1.8         |
| Lack of Confidence     | 0.7 $\pm$ 1.4        | 1.5 $\pm$ 1.8         |
| Sleep Disruption       | 1.5 $\pm$ 1.6        | 1.6 $\pm$ 1.7         |
| Lack of Energy         | 2.2 $\pm$ 1.4        | 2.2 $\pm$ 1.6         |
| Total                  | 12.7 $\pm$ 8.2       | 15.0 $\pm$ 9.6        |
